# Supplementary material
Source: Springer Nature journal article supplement (https://www.springermedizin.de/resource/supplementary/12885_2010_2200_MOESM9_ESM.pdf/9460746)
Supplement: MOESM9 [file 9460746]

**Table 3 : Summary of results.**

| <b>Altered genes</b> | <b>MDSs<br/>N = 66<br/>m/t (%)</b> | <b>Secondary AMLs<br/>N = 18<br/>m/t (%)</b> | <b>Primary AMLs<br/>N = 46<br/>m/t (%)</b> | <b>Total<br/>N = 130<br/>m/t (%)</b> |
|----------------------|------------------------------------|----------------------------------------------|--------------------------------------------|--------------------------------------|
| <i>RUNX1</i>         | 5/65 (7.7)                         | 6/18 (33.3)                                  | 4/46 (8.7)                                 | 15/129 (11.6)                        |
| <i>TET2</i>          | 13/65 (20)                         | 4/18 (22.2)                                  | 5/46 (10.9)                                | 22/129 (17.1)                        |
|                      |                                    |                                              |                                            |                                      |
| <i>ASXL1</i>         | 13/65 (20)                         | 9/18 (50)                                    | 3/46 (6.5)                                 | 25/129 (19.4)                        |
| <i>NPM1</i>          | 0/65 (0)                           | 2/18 (11.1)                                  | 26/46 (56.5)                               | 28/128 (21.9)                        |
|                      |                                    |                                              |                                            |                                      |
| <i>CBL</i>           | 5/65 (7.7)                         | 1/18 (5.5)                                   | 0/46 (0)                                   | 6/129 (4.7)                          |
| <i>FLT3</i>          | 0/65 (0)                           | 2/18 (11.1)                                  | 17/46 (37)                                 | 19/129 (14.7)                        |
| <i>JAK2</i>          | 1/65 (1.5)                         | 0/16 (0)                                     | 1/45 (2.2)                                 | 2/126 (1.6)                          |
| <i>RAS (N or K)</i>  | 1/65 (1.5)                         | 1/18 (5.6)                                   | 2/45 (4.4)                                 | 4/128 (3.1)                          |
|                      |                                    |                                              |                                            |                                      |
| <i>IDH1</i>          | 2/65 (3.1)                         | 0/18 (0)                                     | 3/46 (6.5)                                 | 5/129 (3.9)                          |
| <i>IDH2</i>          | 3/65 (4.6)                         | 5/18 (27.8)                                  | 10/46 (21.7)                               | 18/129 (14)                          |
| <i>IDH1+IDH2</i>     | 5/65 (7.7)                         | 5/18 (27.8)                                  | 13/46 (28.3)                               | 23/129 (17.8)                        |
| <i>WT1</i>           | 0/66 (0)                           | 0/18 (0)                                     | 3/46 (6.5)                                 | 3/129 (2.3)                          |
|                      |                                    |                                              |                                            |                                      |
| 0 alteration         | 33 (50.8)                          | 2 (11)                                       | 2 (4.3)                                    | 37/129 (28.7)                        |
| 1 alteration         | 24 (36.9)                          | 4 (22.2)                                     | 21 (45.7)                                  | 49/129 (38)                          |
| 2 alterations        | 7 (10.8)                           | 9 (50)                                       | 17 (37)                                    | 33/129 (25.6)                        |
| 3 alterations        | 2 (3.1)                            | 3 (16.7)                                     | 6 (13)                                     | 11/129 (8.5)                         |

Abbreviations: AML, acute myeloid leukemia; MDS, myelodysplastic syndrome; N, total number of cases; m, number of mutated cases; t, number of tested cases.
